# Supplementary material for: Facile synthesis of hierarchical MoS2–carbon microspheres as a robust anode for lithium ion batteries
Source: Royal Society of Chemistry journal article supplement (doi:10.1039/c6ta03310e), 2016-01-01
Supplement: c6ta03310e1.pdf [file c6ta03310e1.pdf]

## Supporting Information for

### Facile Synthesis of Hierarchical MoS<sub>2</sub>-Carbon Microspheres as Robust Anode for Lithium Ion Battery

*Gen Chen, Shengping Wang, Ran Yi, Longfei Tan, Hongbo Li, Meng Zhou, Litao Yan, Yingbing Jiang, Shuai Tan, Donghai Wang, Shuguang Deng, Xianwei Meng, Hongmei Luo*

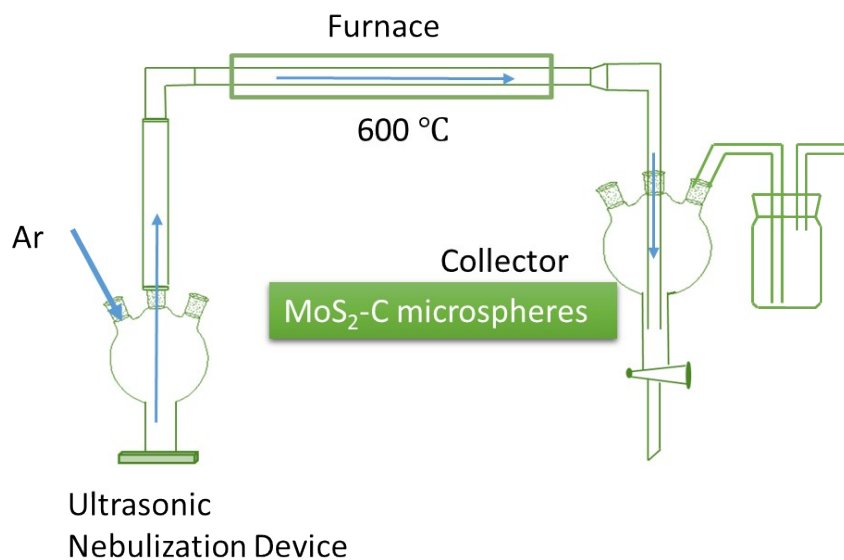

**Figure S1.** Schematical illustration of the synthetic process of hierarchical MoS<sub>2</sub>-C microspheres.

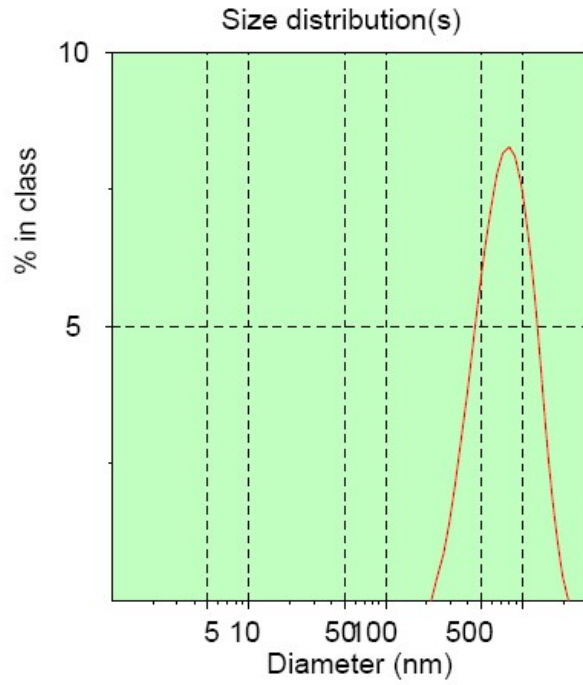

**Figure S2.** Size distribution profile of the hierarchical MoS<sub>2</sub>-C microspheres.

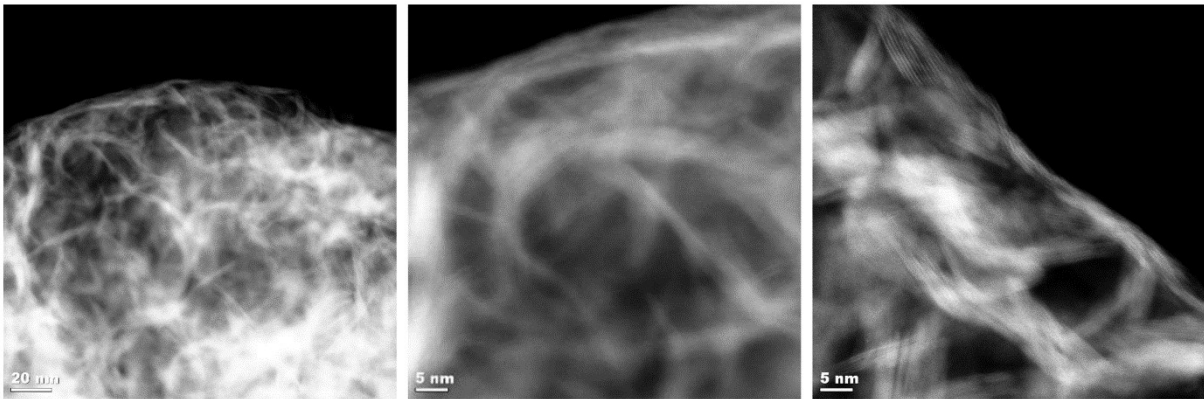

**Figure S3.** More detailed microstructure characterizations of the hierarchical MoS<sub>2</sub>-C microspheres by STEM.

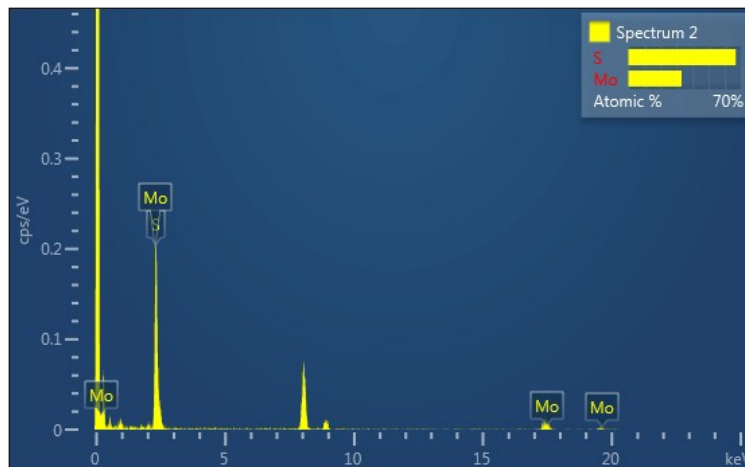

**Figure S4.** EDS spectra of the hierarchical MoS<sub>2</sub>-C microspheres.
